# Supplementary material for: Can microprocessor knees reduce the disparity in trips and falls risks between above and below knee prosthesis users?
Source: PubMed Central journal article supplement (PMC9439191; doi:10.1371/journal.pone.0271315), 2022-09-02
Supplement: pone.0271315.s003.pdf [file pone.0271315.s003.pdf]

## Ordered Logistic Regression full outputs

### 1. Tripping analysis

|                                       | <b>Coef</b> | <b>S.E.</b> | <b>Wald Z</b> | <b>Pr(&gt; Z )</b> | <b>Odds ratio</b> | <b>2.5% CI</b> | <b>97.5% CI</b> |
|---------------------------------------|-------------|-------------|---------------|--------------------|-------------------|----------------|-----------------|
| y>=2                                  | -0.453      | 0.409       | -1.110        | 0.267              | 0.635             | 0.285          | 1.416           |
| y>=3                                  | -3.001      | 0.452       | -6.640        | <0.0001            | 0.050             | 0.021          | 0.121           |
| Prosthesis_type=NonMPK                | 0.672       | 0.264       | 2.550         | 0.011              | 1.958             | 1.167          | 3.283           |
| Prosthesis_type=MPK                   | -0.302      | 0.407       | -0.740        | 0.457              | 0.739             | 0.333          | 1.640           |
| Gender=Female                         | 0.029       | 0.293       | 0.100         | 0.921              | 1.029             | 0.580          | 1.826           |
| Age=40_59_years                       | -0.008      | 0.346       | -0.020        | 0.983              | 0.992             | 0.504          | 1.955           |
| Age=60_79_years                       | -0.218      | 0.363       | -0.600        | 0.548              | 0.804             | 0.395          | 1.638           |
| Age=80_or_more_years                  | -0.430      | 0.684       | -0.630        | 0.530              | 0.651             | 0.170          | 2.484           |
| Years_of_prost_use=Less_than_5_years  | 0.010       | 0.361       | 0.030         | 0.979              | 1.010             | 0.497          | 2.050           |
| Years_of_prost_use=6_10_years         | 0.483       | 0.326       | 1.480         | 0.139              | 1.620             | 0.855          | 3.070           |
| Years_of_prost_use=More_than_10_years | -0.840      | 0.600       | -1.400        | 0.161              | 0.432             | 0.133          | 1.399           |
| Comorbidity=Yes                       | -0.118      | 0.289       | -0.410        | 0.683              | 0.889             | 0.505          | 1.566           |
| Contralateral_limb=Yes                | 0.650       | 0.259       | 2.510         | 0.012              | 1.915             | 1.153          | 3.179           |
| Medication=Yes                        | 0.150       | 0.380       | 0.390         | 0.693              | 1.162             | 0.552          | 2.446           |
| Walking_aid=Yes                       | 0.687       | 0.289       | 2.380         | 0.017              | 1.987             | 1.129          | 3.499           |
| Activity_level=K3                     | 0.249       | 0.296       | 0.840         | 0.400              | 1.283             | 0.718          | 2.293           |
| Activity_level=K4                     | 0.427       | 0.447       | 0.950         | 0.340              | 1.532             | 0.638          | 3.678           |

## 2. Falling analysis

|                                       | <b>Coef</b> | <b>S.E.</b> | <b>Wald Z</b> | <b>Pr(&gt; Z )</b> | <b>Odds ratio</b> | <b>2.5% CI</b> | <b>97.5% CI</b> |
|---------------------------------------|-------------|-------------|---------------|--------------------|-------------------|----------------|-----------------|
| y>=2                                  | -2.914      | 0.830       | -3.510        | 0.000              | 0.054             | 0.011          | 0.276           |
| y>=3                                  | -5.471      | 0.917       | -5.970        | <0.0001            | 0.004             | 0.001          | 0.025           |
| Prosthesis_type=NonMPK                | 1.206       | 0.336       | 3.590         | 0.000              | 3.340             | 1.730          | 6.449           |
| Prosthesis_type=MPK                   | -0.385      | 0.689       | -0.560        | 0.576              | 0.681             | 0.176          | 2.625           |
| Gender=Female                         | -0.247      | 0.389       | -0.630        | 0.526              | 0.781             | 0.364          | 1.675           |
| Age=40_59_years                       | 0.551       | 0.547       | 1.010         | 0.313              | 1.735             | 0.594          | 5.068           |
| Age=60_79_years                       | 0.072       | 0.575       | 0.120         | 0.901              | 1.074             | 0.348          | 3.317           |
| Age=80_or_more_years                  | 0.060       | 0.988       | 0.060         | 0.952              | 1.062             | 0.153          | 7.362           |
| Years_of_prost_use=Less_than_5_years  | 0.153       | 0.499       | 0.310         | 0.760              | 1.165             | 0.438          | 3.099           |
| Years_of_prost_use=6_10_years         | 0.082       | 0.426       | 0.190         | 0.847              | 1.086             | 0.471          | 2.503           |
| Years_of_prost_use=More_than_10_years | -0.273      | 0.860       | -0.320        | 0.751              | 0.761             | 0.141          | 4.108           |
| Comorbidity=Yes                       | 0.119       | 0.368       | 0.320         | 0.747              | 1.126             | 0.547          | 2.318           |
| Contralateral_limb=Yes                | 0.387       | 0.333       | 1.160         | 0.244              | 1.473             | 0.768          | 2.827           |
| Medication=Yes                        | 0.543       | 0.449       | 1.210         | 0.227              | 1.721             | 0.714          | 4.147           |
| Walking_aid=Yes                       | 0.411       | 0.386       | 1.060         | 0.288              | 1.508             | 0.707          | 3.214           |
| Activity_level=K3                     | -0.059      | 0.386       | -0.150        | 0.879              | 0.943             | 0.443          | 2.009           |
| Activity_level=K4                     | 0.110       | 0.589       | 0.190         | 0.852              | 1.117             | 0.352          | 3.542           |

### 3. Falling analysis of those who reported a trip

|                                       | <b>Coef</b> | <b>S.E.</b> | <b>Wald Z</b> | <b>Pr(&gt; Z )</b> | <b>Odds ratio</b> | <b>2.5% CI</b> | <b>97.5% CI</b> |
|---------------------------------------|-------------|-------------|---------------|--------------------|-------------------|----------------|-----------------|
| y>=2                                  | -1.481      | 0.674       | -2.200        | 0.028              | 0.227             | 0.061          | 0.852           |
| y>=3                                  | -4.200      | 0.776       | -5.410        | <0.0001            | 0.015             | 0.003          | 0.069           |
| Prosthesis_type=NonMPK                | 1.005       | 0.379       | 2.650         | 0.008              | 2.732             | 1.299          | 5.745           |
| Prosthesis_type=MPK                   | -1.067      | 0.858       | -1.240        | 0.214              | 0.344             | 0.064          | 1.849           |
| Gender=Female                         | -0.561      | 0.451       | -1.250        | 0.213              | 0.571             | 0.236          | 1.380           |
| Age=40_59_years                       | 0.466       | 0.592       | 0.790         | 0.432              | 1.593             | 0.499          | 5.087           |
| Age=60_79_years                       | 0.212       | 0.615       | 0.340         | 0.731              | 1.236             | 0.370          | 4.127           |
| Age=80_or_more_years                  | -0.340      | 1.062       | -0.320        | 0.749              | 0.712             | 0.089          | 5.710           |
| Years_of_prost_use=Less_than_5_years  | 0.032       | 0.554       | 0.060         | 0.955              | 1.032             | 0.349          | 3.054           |
| Years_of_prost_use=6_10_years         | -0.446      | 0.477       | -0.930        | 0.350              | 0.640             | 0.251          | 1.632           |
| Years_of_prost_use=More_than_10_years | -0.172      | 1.052       | -0.160        | 0.870              | 0.842             | 0.107          | 6.616           |
| Comorbidity=Yes                       | 0.032       | 0.424       | 0.080         | 0.939              | 1.033             | 0.450          | 2.372           |
| Contralateral_limb=Yes                | -0.068      | 0.380       | -0.180        | 0.858              | 0.934             | 0.444          | 1.967           |
| Medication=Yes                        | 0.192       | 0.525       | 0.370         | 0.714              | 1.212             | 0.433          | 3.391           |
| Walking_aid=Yes                       | 0.495       | 0.436       | 1.130         | 0.257              | 1.640             | 0.698          | 3.856           |
| Activity_level=K3                     | 0.139       | 0.424       | 0.330         | 0.743              | 1.149             | 0.500          | 2.638           |
| Activity_level=K4                     | 0.057       | 0.666       | 0.090         | 0.932              | 1.058             | 0.287          | 3.903           |
